# Supplementary material
Source: MDPI journal article supplement (https://www.mdpi.com/2673-9976/4/1/83)
Supplement: s1 [file s1]

# Tissue accumulation and quantification of Zn in biofortified *Triticum aestivum* grains – Interactions with Mn, Fe, Cu, Ca, K, P and S

Inês Carmo Luís<sup>1,2,\*</sup>, Cláudia Pessoa<sup>1,2</sup>, Ana Marques<sup>1,2</sup>, Diana Daccak<sup>1,2</sup>, Ana Coelho<sup>1,2</sup>, Fernando Lidon<sup>1,2</sup>, Manuel Patanita<sup>2,3</sup>, Maria Manuela Silva<sup>2,4</sup>, Ana Sofia Almeida<sup>2,5</sup>, José Ramalho<sup>2,6</sup>, Maria Pessoa<sup>1,2</sup>, Manuela Simões<sup>1,2</sup>, Fernando Reboredo<sup>1,2</sup>, Paulo Legoinha<sup>1,2</sup>, Paula Scotti-Campos<sup>2,7</sup>, Isabel Pais<sup>2,7</sup>, Mauro Guerra<sup>8</sup>, Roberta Leitão<sup>8</sup> and José Dores<sup>3</sup>

<sup>1</sup>Earth Sciences Department, Faculdade de Ciências e Tecnologia, Universidade Nova de Lisboa, Caparica, Portugal;

<sup>2</sup>GeoBioTec Research Center, Faculdade de Ciências e Tecnologia, Universidade Nova de Lisboa, Caparica, Portugal;

<sup>3</sup>Escola Superior Agrária, Instituto Politécnico de Beja, Beja, Portugal;

<sup>4</sup>ESEAG / Grupo Universidade Lusófona, Lisboa, Portugal;

<sup>5</sup>INIAV, Instituto Nacional de Investigação Agrária e Veterinária, Elvas, Portugal;

<sup>6</sup>PlantStress & Biodiversity Lab, Centro de Estudos Florestais, Instituto Superior Agronomia, Universidade de Lisboa, Oeiras, Portugal;

<sup>7</sup>INIAV, Instituto Nacional de Investigação Agrária e Veterinária, Oeiras, Portugal;

<sup>8</sup>LIBPhys-UNL, Physics Department, Faculdade de Ciências e Tecnologia, Universidade Nova de Lisboa, Caparica, Portugal.

\* Corresponding author: [idc.rodriques@campus.fct.unl.pt](mailto:idc.rodriques@campus.fct.unl.pt)

**Abstract:** Zinc has a fundamental role at the regulatory, functional and structural levels, yet its deficiency leads to loss of brain function, changes in growth and weakening of the immune system. In this context, biofortification, which is a process in which there is an enrichment of both content and the bioavailability of micronutrients in edible tissues of staple foods, may be used to overcome Zn deficiency. Considering that *Triticum aestivum* L. is a staple food largely used for flour production, an itinerary for Zn biofortification was implemented in two cvs (Roxo and Paiva), produced in an experimental cereal field production located in Alentejo, Portugal. These cvs were submitted to three different treatments (control – without foliar spraying, 6.3 and 12.6 kg ha<sup>-1</sup> of Zn-EDTA pulverization), being applied three zinc foliar application at booting, heading and grain milk stages. The accumulation of Zn, Mn, Fe, Cu, Ca, K, P and S in bread wheat was investigated, being found that, in general, maximum contents occurred in the embryo and vascular bundle. Besides, although Zn increased in the wheat grain, specially the higher concentration, did not markedly affected the other minerals concentration. It was concluded that whole wheat flour biofortified in Zn is a more suitable option for a healthier diet, rich in minerals and leading to the creation of an added value product useful to decrease micronutrient deficiency.

**Keywords:** Grain minerals location; Minerals quantification; *Triticum aestivum*; Zn biofortification.

## Results and Discussion

In overall, the macroelements P, S, K and Ca, as well as the microelements Mn, Fe, Cu and Zn are preferably located in the embryo and in the vascular bundle. Besides, for all mineral mentioned, both varieties tended to present similar values. There was a gradual rise of Zn levels with increasing concentration of Zn-EDTA in all the grain zones, with Paiva displaying slightly higher values than Roxo.

## Conclusions

Through Zn-EDTA foliar spraying, in general, accumulation of Zn, Mn, Fe, Cu, Ca, K, P and S in bread wheat prevails in the embryo and vascular bundle. Through the applied biofortification itinerary of both cvs, Zn increased in the wheat grain, specially the higher concentration, but did not affected markably the other minerals concentration in the grain, which suggests that the whole wheat flour biofortified in Zn is a more suitable option for a healthier diet rich in minerals and leading to the creation of an added value product useful to decrease micronutrient deficiency.

## Acknowledgments

The authors thanks to Instituto Politécnico de Beja and Associação de Agricultores do Baixo Alentejo (AABA) for technical assistance in the experimental field. Additionally, the authors thanks to project PDR2020 – 101-030835 – for the financial support and to Research centers (GeoBioTec) UIDB/04035/2020 and UID/FIS/04559/2013 to LIBPhys-UNL for support facilities.

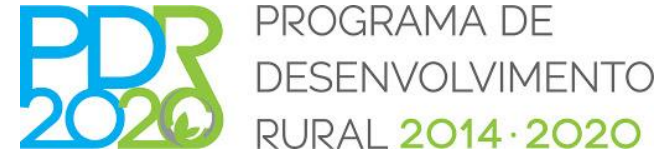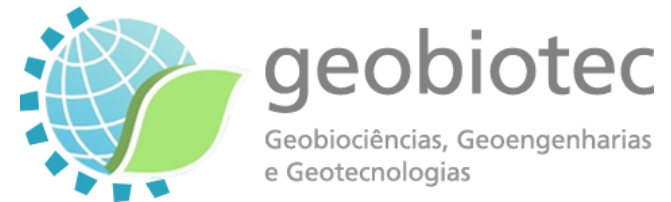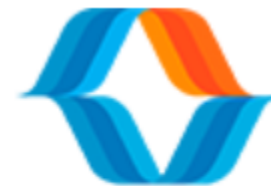

LIBPhys-UNL

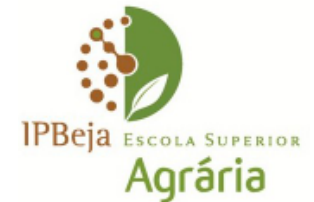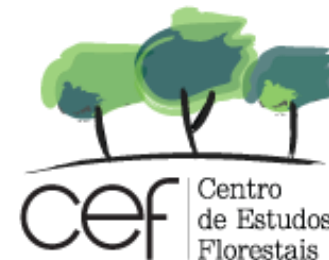

IECPS  
2020
